# Supplementary material for: Map-Based Cloning and Functional Analysis of YE1 in Rice, Which Is Involved in Light-Dependent Chlorophyll Biogenesis and Photoperiodic Flowering Pathway
Source: PubMed Central journal article supplement (PMC6387406; doi:10.3390/ijms20030758), 2019-02-11
Supplement: ijms-20-00758-s001.pdf [file ijms-20-00758-s001.pdf]

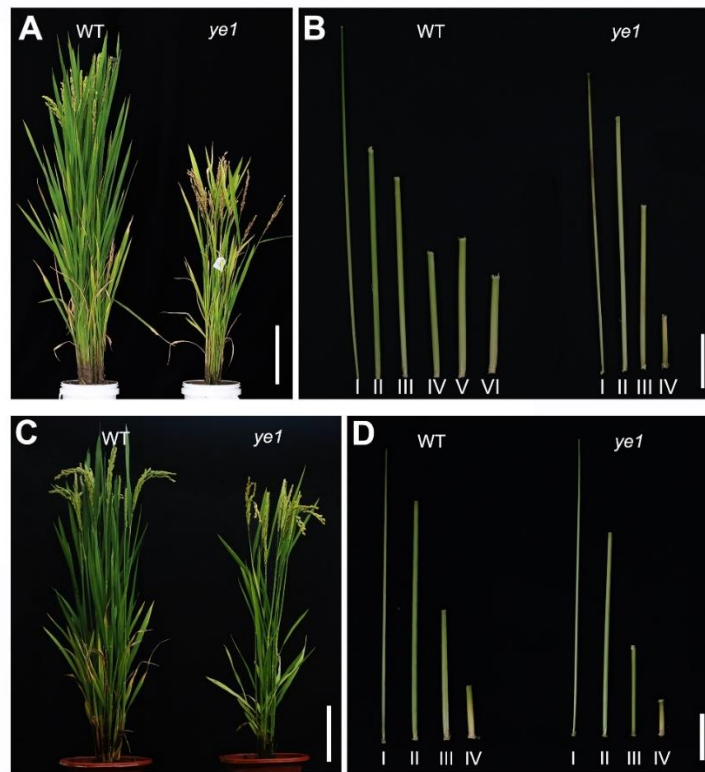

**Figure S1.** Phenotypes of WT and *ye1* under NLDs and NSDs. (A) Whole plant morphology of WT and *ye1* under NLDs at mature stage. Bar=25 cm. (B) Internodes of WT and *ye1* under NLDs at mature stage. Bar=5 cm. (C) Whole plant morphology of WT and *ye1* under NSDs at mature stage. Bar=20 cm. (D) Internodes of WT and *ye1* under NLDs at mature stage. Bar=5 cm.

```

LOC_Os06g40080 : MAPAAASLTAPNALAATSLEFLLHGRKSGGGVSVHAGAPSPSRVAVVARRLNGSASSSRMVVAAATAEMAPAASGEE : 80
ye1 : MAPAAASLTAPNALAATSLEFLLHGRKSGGGVSVHAGAPSPSRVAVVARRL----- : 52

LOC_Os06g40080 : GKPFVEEMRAVAMRLHTKDQAKEGEKEPQAPPVARWEPSVDGYLRFLVDKLVFETLETIVDRAAVPWYAEFRNTGLERS : 160
ye1 : ----- : -

Heme oxygenase domain (PFAM accession: PF01126.13)

LOC_Os06g40080 : EQLKKDLEWFKEQGHTIPEPSAPGTTYASYLEELA EKDSQAFICHFYNVYFAHTAGGRMIGKKVSENILNKKELEFYKWE : 240
ye1 : ----- : -

LOC_Os06g40080 : GNLSQLLQNVNRKLN EVASSWTREKDHCLDETEKSFSYSGDLLRHIFT : 289
ye1 : ----- : -

```

**Figure S2.** Peptides alignment of YE1 protein in WT (LOC\_Os06g40080) and *ye1*. Green boxes indicate the region of heme oxygenase domain (PFAM accession: PF01126.13).

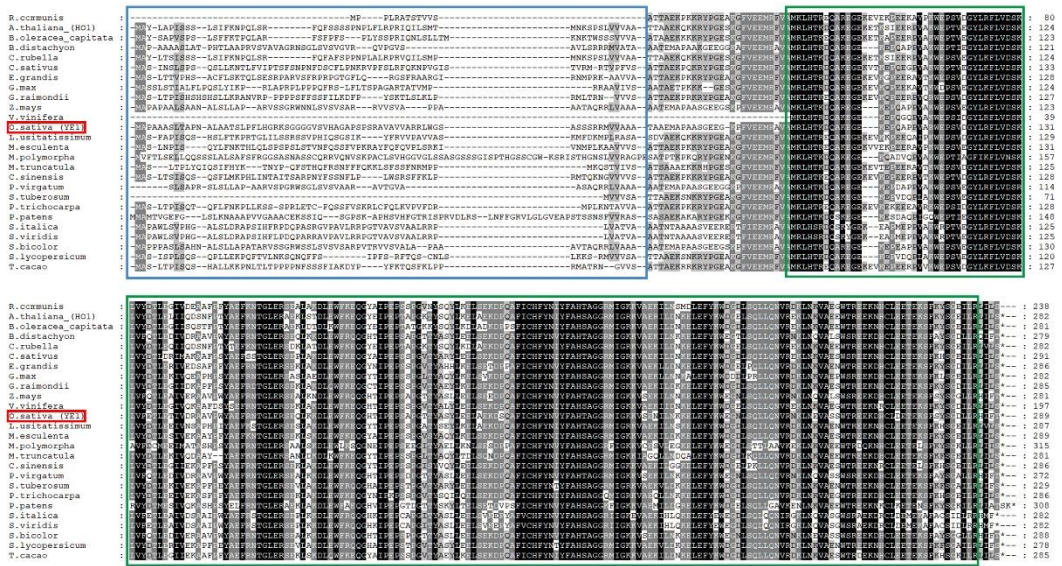

**Figure S3.** Peptides alignment of YE1-related proteins. Red frames indicate the YE1 protein. Blue frame indicate the high sequence diversity region in N-terminus. Green frames indicate the conserved heme oxygenase domain in C-terminus.

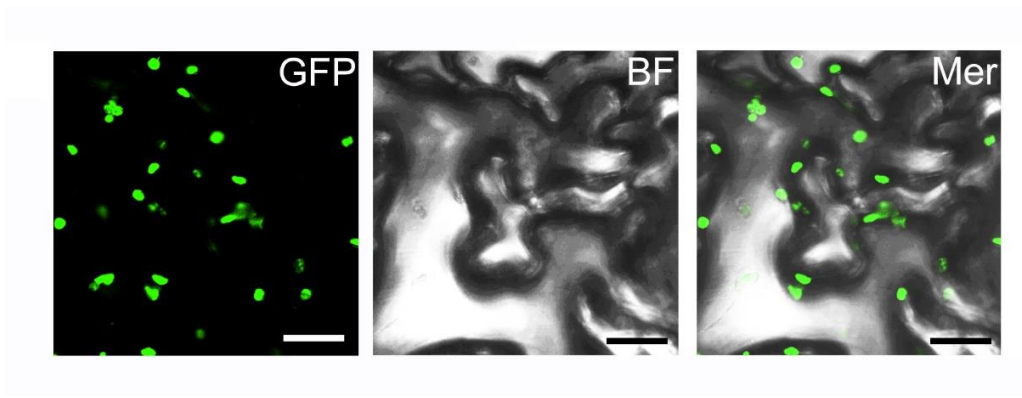

**Figure S4.** Subcellular location of YE1 protein in tobacco leaf epidermal cells. Bars=10  $\mu$ m. BF, bright field; Mer, merge of each channel.

**Table S1.** Phenotype and genotype association analyses in F2 generation of *ye1*/WT.

| Phenotype                       | No. of plants examined | No. of plants with +/+ | No. of plants with +/- | No. of plants with -/- |
|---------------------------------|------------------------|------------------------|------------------------|------------------------|
| Normal growth                   | 47                     | 18                     | 29                     | 0                      |
| Yellow leaf and early flowering | 13                     | 0                      | 0                      | 13                     |

All these plants are in *japonica* wuyungeng 21 background. +/+, +/-, and -/- indicate homozygous wild type genotype, heterozygous genotype, and homozygous mutation, respectively. No., numbers.

**Table S2.** Information of YE1-related proteins retrieved from Phytozome.

| Species                     | Protein Name         | Description                                                          |
|-----------------------------|----------------------|----------------------------------------------------------------------|
| <i>M. Polymorpha</i>        | Mapoly0016s0114      | Heme Oxygenase                                                       |
| <i>S. Lycopersicum</i>      | Solyc12g009470.1     | Heme Oxygenase (Biliverdin-Producing) / Heme Oxygenase (Decyclizing) |
| <i>G. Max</i>               | Glyma.04g147700      | Heme Oxygenase                                                       |
| <i>A. Thaliana</i>          | At2g26670 (HO1)      | Plant Haem Oxygenase (Decyclizing) Family Protein                    |
| <i>E. Grandis</i>           | Eucgr.C01176         | Heme Oxygenase                                                       |
| <i>C. Rubella</i>           | Carubv10023804m.G    | Heme Oxygenase                                                       |
| <i>G. Raimondii</i>         | Gorai.010g063800     | Heme Oxygenase                                                       |
| <i>B. Oleracea Capitata</i> | Bol027145            | Heme Oxygenase                                                       |
| <i>C. Sinensis</i>          | Orange1.1g023201m.G  | Heme Oxygenase                                                       |
| <i>S. Tuberosum</i>         | Pgsc0003dmg400002891 | Heme Oxygenase 1                                                     |
| <i>S. Viridis</i>           | Sevir.4g233900       | Heme Oxygenase                                                       |
| <i>O. Sativa</i>            | Loc_Os06g40080 (YE1) | Heme Oxygenase 1, Putative, Expressed                                |
| <i>S. Italica</i>           | Seita.4g223100       | Heme Oxygenase                                                       |
| <i>S. Bicolor</i>           | Sobic.010g184600     | Heme Oxygenase                                                       |
| <i>P. Trichocarpa</i>       | Potri.018g131700     | Heme Oxygenase (Biliverdin-Producing) / Heme Oxygenase (Decyclizing) |
| <i>P. Patens</i>            | Pp3c3_21750          | Heme Oxygenase                                                       |
| <i>R. Communis</i>          | 28320.T000060        | Conserved Hypothetical Protein                                       |
| <i>V. Vinifera</i>          | Gsvivg01015535001    | Heme Oxygenase (Biliverdin-Producing) / Heme Oxygenase (Decyclizing) |
| <i>B. Distachyon</i>        | Bradi1g36640         | Heme Oxygenase                                                       |
| <i>M. Esculenta</i>         | Manes.14g132400      | Heme Oxygenase (Biliverdin-Producing) / Heme Oxygenase (Decyclizing) |
| <i>M. Truncatula</i>        | Medtr8g019320        | Heme Oxygenase                                                       |
| <i>C. Sativus</i>           | Cucsa.292760         | Heme Oxygenase                                                       |
| <i>Z. Mays</i>              | Grzm2g043277         | Heme Oxygenase                                                       |
| <i>L. Usitatissimum</i>     | Lus10030092.G        | Heme Oxygenase                                                       |
| <i>P. Virgatum</i>          | Pavir.Da00541        | Heme Oxygenase                                                       |
| <i>T. Cacao</i>             | Thecc1eg038078       | Plant Heme Oxygenase Family Protein                                  |

**Table S3.** Primers used in this study.

| Primer name | Forward                                     | Reverse                                           | Application              |
|-------------|---------------------------------------------|---------------------------------------------------|--------------------------|
| RM20223     | CACTTAGGAGCCGTCATGTACACC                    | GCTCTTGATCATGTTGAGTGTGACC                         | Gene mapping             |
| RM5371      | GGCTAGCTTTAGCTGCGTTG                        | ACCCAGATCGAAACAACACTGC                            | Gene mapping             |
| ID1         | CCCAATTCAAGATCCATTTCA                       | TTCACCCTCTTGCTGTACCC                              | Gene mapping             |
| ID2         | GGACCACCAAAGGAGACTG                         | TACGGCTGGCTTGAGAGAAT                              | Gene mapping             |
| ID3         | AAGGACCACCCGTACACTTT                        | GATGGCCAACATGCATACTCT                             | Gene mapping             |
| ID4         | GGACCGAGATGAGTTGGCTA                        | GTGAGGACGGAGAGACAAGG                              | Gene mapping             |
| ID5         | CCAAAAGGACTGGGGACTCT                        | CAAGGGGGTGACCAAATAA                               | Gene mapping             |
| ID6         | GTGGTGATCACGGAGTTTCC                        | TTACGAAAACCTGAAATTTTGTG                           | Gene mapping             |
| YE1-SEQ     | TCACTCCGCAGAAGCAAC                          | ATGGCACTGGTCTTATGGTC                              | Mutation site sequencing |
| YE1-COM     | acgacggccagtccaagctt<br>ATGGCGCCCGCGGCAGC   | gacctgcaggcatccaagctt<br>TTAGGTGAATATGTGACGGAGGAG | Complementary analysis   |
| PYE1-COM    | tgctgcaggtgactctaga<br>TGCCACTGACTAACCTTTGC | ggtaccggggatcctctaga<br>GAGTCCCGCCACCTCTCT        | Complementary analysis   |
| YE1-GFP     | gagaacacgggggactctaga<br>ATGGCGCCCGCGGCAGC  | accaccggggatcctctaga<br>GGTGAATATGTGACGGAGGAG     | Subcellular location     |
| Q-OsACTIN1  | CTAAGCCAAGAGGAGCTGTTAT                      | ATAACAGATAGGCCGTTGAAA                             | Expression analysis      |
| Q-YE1       | ATGTGTATTTTGCTCATACGGC                      | ATCTCCAGAATACGAGAACGAC                            | Expression analysis      |
| Q-psbA      | GCGGTTCCCTATTCAGTGCTATG                     | TAACCATGAGCGGCCACAATATT                           | Expression analysis      |
| Q-psaA      | TGGGGTTGATCCTAAGGAGATACCA                   | CCTCCGCGAAAATAAGAAATTCTG                          | Expression analysis      |
| Q-rbcS      | CATGTGCTGTACCACTTCTTTC                      | AGGTACATAGAACACCTGCAAA                            | Expression analysis      |
| Q-rbcL      | CGTTTTGTCTTTTGCCAAAG                        | CTAATCCCTCGCAAATACAGC                             | Expression analysis      |
| Q-DVR       | GTTCTTCGAGAGGGTGATCAG                       | GGCGTCTGAAACATTAAGAACA                            | Expression analysis      |
| Q-CAO1      | CATCACGGGATGCAATTGTAAT                      | ACATGCGATCGACTTTTACATG                            | Expression analysis      |
| Q-CHLD      | ATGCTTCAGACGCTGTTATTTTC                     | AATTGGTTATCACAGCCGAAAC                            | Expression analysis      |
| Q-CHLH      | CGCCAAAATTATTGTAGACCGT                      | CCAATGACTCACCATAGGTCTT                            | Expression analysis      |
| Q-PORA      | TAATTTCTTCGGGGTTTAGGGG                      | GTAAGCCTGTGGTTTTATTGCA                            | Expression analysis      |
| Q-YGL1      | GGAAGATGCAGATTGATGGTTC                      | CCAAAAGAGCGCTAATACACTC                            | Expression analysis      |
| Q-DTH7      | TAGTTGATAGCGATGACTCCAC                      | CATTTTCAGCAGGGATGACTTC                            | Expression analysis      |

---

|        |                        |                         |                        |
|--------|------------------------|-------------------------|------------------------|
| Q-DTH8 | GTAACCTGGCGTTGGTTATCAG | CTCGATAACGACAACAGCATG   | Expression<br>analysis |
| Q-EF7  | AATGTAGAGAAGAGGTTTGCCA | GCAATGGCTTTACATAGCGTTA  | Expression<br>analysis |
| Q-EHD2 | AGCAGAAAATCGAAACTAGTGC | ATCCAGAGTCGCAAAAGTTAGA  | Expression<br>analysis |
| Q-HD1  | TTCAGGTCCTCGCTTCA      | GCATACGCCTTTCTTGTTTCATA | Expression<br>analysis |
| Q-HD16 | GAAGTTATTGCTAGAAAGGCGG | CCACCTTTACCCAACCTTCCTAT | Expression<br>analysis |
| Q-OsGI | GGTGGCTATGTATCATCGTACA | CAACAATGGCAAGTATAGGCTC  | Expression<br>analysis |

---

Adaptors for plasmids construction are in lower case.
